# Supplementary material for: A Proteomic View at T Cell Costimulation
Source: PubMed Central journal article supplement (PMC3335147; doi:10.1371/journal.pone.0032994), 2012-04-23
Supplement: pone.0032994.s001.pdf [file pone.0032994.s001.pdf]

**Table S1: List of differentially expressed proteins defined by silver staining (regulation factor > 2)**

**A) up-regulated proteins**

|        |        |        |               | <b>CD3/PBS</b>            | <b>CD28/PBS</b> | <b>CD3 + CD28/PBS</b>      |
|--------|--------|--------|---------------|---------------------------|-----------------|----------------------------|
| shared | single | target | spots         | CAZA2, P47755             |                 | CAZA2, P47755              |
|        |        |        |               | CXCL7, P02775             | CXCL7, P02775   |                            |
|        |        |        |               | TPM1, P09493              |                 | TPM1, P09493               |
| single | target | spots  | ACTN1, P12814 | CALM, P62158              | MYH9, P35579    |                            |
|        |        |        | ALDOA, P04075 | HBB, P68871               | STXB2, Q15833   |                            |
|        |        |        | ILK, P57043   | PGK1, P00558              | THIO, P10599    |                            |
|        |        |        | PROF1, P07737 |                           |                 |                            |
|        |        |        | VINC, P18206  |                           |                 |                            |
|        |        |        |               |                           |                 |                            |
| multi  | ple    | target | spots         | ACTB, P60709/ACTG, P63261 |                 | ACTB, P60709/ACTG, P63261  |
|        |        |        |               | ACTB, P60709/ACTG, P63261 |                 | ACTN1, P12814/VINC, P18206 |

**B) down-regulated proteins**

|          |        |        |               | <b>CD3/PBS</b>                                         | <b>CD28/PBS</b> | <b>CD3 + CD28/PBS</b> |
|----------|--------|--------|---------------|--------------------------------------------------------|-----------------|-----------------------|
| shared   | single | target | spots         | GELS, P06396                                           | GELS, P06396    | GELS, P06396          |
|          |        |        |               |                                                        |                 |                       |
| single   | target | spots  | ALBU, P02768  | ALDOA P04075                                           | ACTN1, P12814   |                       |
|          |        |        | ARPC2, O15144 | ATPB, P06576                                           | FIBG, P02679    |                       |
|          |        |        | CALR, P27797  | CLIC1, O00299                                          | PSB4, P28070    |                       |
|          |        |        | PDIA1, P07237 | ENOA, P06733                                           | PDIA3, P30101   |                       |
|          |        |        | TALDO, P37837 | ENOA, P06733                                           | SODM, P04179    |                       |
|          |        |        | TBB5, P07437  | GAPDH, P04406                                          |                 |                       |
|          |        |        | VINC, P18206  | GAPDH, P04406                                          |                 |                       |
|          |        |        |               | HSP7C, P11142                                          |                 |                       |
|          |        |        |               | LDHB, P07195                                           |                 |                       |
|          |        |        |               | GDIA, P31150                                           |                 |                       |
|          |        |        |               | GDIR2, P52566                                          |                 |                       |
| multiple | target | spots  |               | ACTB, P60709/ ACTG, P63261 TBA1B, P68363/TBA1C, Q9BQE3 |                 |                       |
|          |        |        |               | ACTB, P60709/ ACTG, P63261                             |                 |                       |
|          |        |        |               | TPM2, P07951/K1C10, P13645                             |                 |                       |
