# Supplementary material for: A Proteomic View at T Cell Costimulation
Source: PubMed Central journal article supplement (PMC3335147; doi:10.1371/journal.pone.0032994), 2012-04-23
Supplement: pone.0032994.s002.pdf [file pone.0032994.s002.pdf]

**Table S2: List of differentially expressed proteins classified according to their cellular function**

**A) up-regulated proteins**

| <b>stimul. mode</b>              | <b>CD3/PBS</b>  | <b>CD3 + IL-2/PBS</b> | <b>CD28/PBS</b> | <b>CD3 + CD28/PBS</b> |
|----------------------------------|-----------------|-----------------------|-----------------|-----------------------|
| <b>metabolic process</b>         |                 |                       |                 |                       |
|                                  | ALDOA, P04075 * |                       |                 |                       |
|                                  |                 | ATP5B, P06576 #       |                 |                       |
|                                  | ENOA, P06733 #  | ENOA, P06733 #        |                 |                       |
|                                  |                 |                       |                 | HSP7C, P11142 #       |
|                                  |                 |                       | LDHB, P07195 #  |                       |
|                                  |                 | PDIA3, P30101 #       | PDIA3, P30101 # |                       |
|                                  |                 |                       | PGK1, P00558*   |                       |
|                                  |                 |                       |                 | THIO, P10599 *        |
|                                  | TPIS, P60174 #  |                       | TPIS, P60174 #  |                       |
|                                  |                 |                       | UGPA, Q16851 #  | UGPA, Q16851 #        |
| <b>cytoskeleton organization</b> |                 |                       |                 |                       |
|                                  | ACTN1, P12814 * | ACTN1 P12814 #        | ACTN1 P12814 #  |                       |
|                                  |                 |                       | ARP3, P61158 #  |                       |
|                                  | CAZA2, P47755 * |                       |                 | CAZA2, P47755 *       |
|                                  |                 |                       |                 | GELS, P06396 #        |
|                                  |                 |                       |                 | MYH9, P35579 *        |
|                                  | PROF1, P07737 * |                       |                 |                       |
|                                  | TBB5, P07437 #  | TBB5, P07437 #        |                 |                       |
|                                  |                 |                       |                 | TLN1, Q9Y490 #        |
|                                  | TPM1, P09493 *  |                       |                 | TPM1, P09493 *        |
|                                  |                 | PLSL, P13796 #        | PLSL, P13796 #  | PLSL, P13796 #        |
|                                  | VINC, P18206 *  | VINC, P18206 #        |                 |                       |
| <b>signal transduction</b>       |                 |                       |                 |                       |
|                                  |                 |                       | CALM, P62158 *  |                       |
|                                  | GDIR1, P52565 # |                       |                 |                       |
|                                  |                 |                       |                 | HSP7C, P11142 #       |
|                                  | ILK, P57043 *   |                       |                 |                       |
|                                  |                 |                       | LIMS1, P48059 # |                       |
|                                  |                 | PDIA3, P30101 #       | PDIA3, P30101 # |                       |
| <b>others</b>                    |                 |                       |                 |                       |
|                                  | CALR, P27797 #  | CALR, P27797 #        |                 |                       |
|                                  | CXCL7, P02775 * |                       | CXCL7, P02775 * |                       |

|                 |                 |                 |
|-----------------|-----------------|-----------------|
|                 | FIBB, P02675 #  |                 |
| GRP78, P11021 # | GRP78, P11021 # |                 |
|                 |                 | HBB, P68871 #   |
| HS90A, P07900 # | HS90A, P07900 # |                 |
|                 | ITA2B, P08514 # |                 |
|                 |                 | STXB2, Q15833 * |

---

## B) down-regulated proteins

| stimul. mode                     | CD3/PBS         | CD3 + II-2/PBS  | CD28/PBS        | CD3 + CD28/PBS  |
|----------------------------------|-----------------|-----------------|-----------------|-----------------|
| <b>metabolic process</b>         |                 |                 |                 |                 |
|                                  | ALBU, P02768 †  | ALBU, P02768 #  |                 |                 |
|                                  | ALDOA, P04075 # | ALDOA, P04075 # | ALDOA, P04075 † |                 |
|                                  |                 |                 | ATPB, P06576 *  |                 |
|                                  |                 | ATPH5, O75947 # |                 |                 |
|                                  |                 |                 | ENOA, P06733 *  |                 |
|                                  |                 |                 | GAPDH, P04406 † |                 |
|                                  | HSP7C, P11142 # | HSP7C, P11142 # | HSP7C, P11142 † |                 |
|                                  |                 |                 | LDHB, P07195 *  |                 |
|                                  | PDIA1, P7237 *  |                 |                 | PDIA3, P30101 * |
|                                  |                 | PSB4, P28070 #  |                 | PSB4, P28070 *  |
|                                  | SODM, P04179 #  | SODM, P04179 #  | SODM, P04179 #  | SODM, P04179 *  |
|                                  | TALDO, P37837 * |                 |                 |                 |
|                                  |                 | THIO, P10599 #  |                 |                 |
|                                  |                 |                 |                 | TKT, P29401 #   |
| <b>cytoskeleton organization</b> |                 |                 |                 |                 |
|                                  |                 |                 |                 | ACTN1, P12814 * |
|                                  | ARPC2, O15144 * | ARPC2, O15144 # |                 |                 |
|                                  |                 | FLNA, P21333 #  |                 |                 |
|                                  | GELS, P06396 †  | GELS, P06396 #  | GELS, P06396 †  | GELS, P06396 *  |
|                                  |                 | PROF1, P07737 # | PROF1, P07737 # | PROF1, P07737 # |
|                                  | TBA8, Q9NY65 #  | TBA8, Q9NY65 #  | TBA8, Q9NY65 #  | TBA8, Q9NY65 #  |
|                                  | TBB5, P07437 *  | TBB5, P07437 #  |                 | TBB5, P07437 #  |
|                                  | TLN1, Q9Y490 #  | TLN1, Q9Y490 #  | TLN1, Q9Y490 #  |                 |
|                                  |                 | TPM3, P06753 #  |                 |                 |
|                                  | VINC, P18206 †  | VINC, P18206 #  | VINC, P18206 #  | VINC, P18206 #  |

---

**signal transduction**

---

|                 |                 |                 |                 |
|-----------------|-----------------|-----------------|-----------------|
| ANXA5, P08758 # |                 |                 |                 |
| CLIC1, O00299 * |                 |                 |                 |
| GDIA, P31150 *  |                 |                 |                 |
| GDIR2, P52566 * |                 |                 |                 |
| GRB2, P62993 #  |                 |                 |                 |
| HSP7C, P11142 # | HSP7C, P11142 # | HSP7C, P11142 ` |                 |
| ILK, P57043 #   | ILK, P57043 #   | ILK, P57043 #   | ILK, P57043 #   |
|                 |                 |                 | PDIA3, P30101 * |

---

**others**

---

|                 |  |                |  |
|-----------------|--|----------------|--|
| CALR, P27797 *  |  |                |  |
| CXCL7, P02775 # |  |                |  |
| FIBB, P02675 #  |  | FIBB, P02675 # |  |
| FIBG, P02679 *  |  |                |  |
| HS90A, P07900 # |  |                |  |
| SH3L3, Q9H299 # |  |                |  |

---

\*, # and ` indicate targets either defined based on silver, DIGE or both stainings. The group of others is comprised of targets assigned to functions other than the 3 main categories.
