# Supplementary material for: A Proteomic View at T Cell Costimulation
Source: PubMed Central journal article supplement (PMC3335147; doi:10.1371/journal.pone.0032994), 2012-04-23
Supplement: pone.0032994.s003.pdf [file pone.0032994.s003.pdf]

**Table S3: List of differentially expressed proteins (DIGE minimal labeling, regulation factor > 1.5)**

**A) up-regulated proteins**

|                            | <b>CD3/PBS</b>                           | <b>CD3 + II-2/PBS</b>       | <b>CD28/PBS</b>             | <b>CD3 + CD28/PBS</b>       |
|----------------------------|------------------------------------------|-----------------------------|-----------------------------|-----------------------------|
| shared single target spots | CALR, P27797                             | CALR, P27797                |                             |                             |
|                            | ENOA, P06733                             | ENOA, P06733                |                             |                             |
|                            | GRP78, P11021                            | GRP78, P11021               |                             |                             |
|                            | HS90A, P07900                            | HS90A, P07900               |                             |                             |
|                            | TBB5, P07437                             | TBB5, P07437                |                             |                             |
|                            | TPIS, P60174                             |                             | TPIS, P60174                |                             |
|                            |                                          | ACTN1 P12814                | ACTN1 P12814                |                             |
|                            |                                          | PLSL, P13796                | PLSL, P13796                | PLSL, P13796                |
|                            |                                          | PDIA3, P30101               | PDIA3, P30101               |                             |
|                            |                                          | PDIA3, P30101               | PDIA3, P30101               |                             |
| single target spots        |                                          |                             | UGPA, Q16851                | UGPA, Q16851                |
|                            | GDIR1, P52565                            | ATPB, P06396                | ARP3, P61158                | GELS, P06396                |
|                            |                                          | FIBB, P02675                | LDHB, P07195                | HSP7C, P11142               |
|                            |                                          | ITA2B, P08514               | LIMS1, P48059               | TLN1, Q9Y490                |
|                            |                                          | VINC, P18206                |                             |                             |
| multiple target spots      | ACTB, P60709/ ACTG, P63261               | ACTB, P60709/ ACTG, P63261  |                             | ACTB, P60709/ ACTG, P63261  |
|                            | ACTB, P60709/ ACTG, P63261               | ACTB, P60709/ ACTG, P63261  |                             |                             |
|                            | ACTN1, P12814/VIME, P08670               |                             |                             | ACTN1, P12814/VIME, P08670  |
|                            | TBA4A, P68366/TBA1A, Q71U36              | TBA4A, P68366/TBA1A, Q71U36 | TBA4A, P68366/TBA1A, Q71U36 | TBA4A, P68366/TBA1A, Q71U36 |
|                            |                                          | TBA4A, P68366/VIME, P08670  |                             | TBA4A, P68366/VIME, P08670  |
|                            |                                          | FIBB, P02675/COR1A, P31146  | FIBB, P02675/ COR1A, P31146 |                             |
|                            |                                          |                             | CRCM, P23508/CALX, P27824   | CRCM, P23508/CALX, P27824   |
|                            | TPM2, P07951/TPM4, P67936/ K1C10, P13645 | ACTB, P60709/ ACTG, P63261  |                             | ACTN1, P12814/K1C10, P13645 |
|                            |                                          |                             |                             | GRP75, P38646/ANXA6, P08133 |

**B) down-regulated proteins**

|                             | CD3/PBS                                     | CD3 + IL-2/PBS                              | CD28/PBS                                    | CD3 + CD28/PBS             |  |
|-----------------------------|---------------------------------------------|---------------------------------------------|---------------------------------------------|----------------------------|--|
| shared single protein spots | ALBU, P02768                                | ALBU, P02768                                |                                             |                            |  |
|                             | ALDOA, P04075                               | ALDOA, P04075                               | ALDOA, P04075                               |                            |  |
|                             |                                             | ALDOA, P04075                               | ALDOA, P04075                               |                            |  |
|                             | GELS, P06396                                | GELS, P06396                                | GELS, P06396                                |                            |  |
|                             | HSP7C, P11142                               | HSP7C, P11142                               |                                             |                            |  |
|                             | HSP7C, P11142                               | HSP7C, P11142                               |                                             |                            |  |
|                             | ILK, P57043                                 | ILK, P57043                                 | ILK, P57043                                 | ILK, P57043                |  |
|                             | SODM, P04179                                | SODM, P04179                                | SODM, P04179                                |                            |  |
|                             | TBA8, Q9NY65                                | TBA8, Q9NY65                                | TBA8, Q9NY65                                | TBA8, Q9NY65               |  |
|                             | TLN1, Q9Y490                                | TLN1, Q9Y490                                | TLN1, Q9Y490                                |                            |  |
| VINC, P18206                | VINC, P18206                                | VINC, P18206                                | VINC, P18206                                |                            |  |
| VINC, P18206                | VINC, P18206                                | VINC, P18206                                |                                             |                            |  |
|                             | PROF1, P07737                               | PROF1, P07737                               | PROF1, P07737                               |                            |  |
|                             | TBB5, P07437                                |                                             | TBB5, P07437                                |                            |  |
| single protein spots        | VINC, P18206                                | ANXA5, P08758                               | CXCL7, P02775                               | FIBB, P02675               |  |
|                             |                                             | ARPC2, O15144                               | GAPDH, P04406                               | HS90A, P07900              |  |
|                             |                                             | ATP5H, O75947                               | GRB2, P62993                                | TKT, P29401                |  |
|                             |                                             | FIBB, P02675                                | HSP7C, P11142                               |                            |  |
|                             |                                             | FLNA, P21333                                | SH3L3, Q9H299                               |                            |  |
|                             |                                             | PSB4, P28070                                |                                             |                            |  |
|                             |                                             | THIO, P10599                                |                                             |                            |  |
|                             |                                             | TPM3, P06753                                |                                             |                            |  |
|                             | multiple target spots                       | ACTB, P60709/ ACTG, P63261                  | ACTB, P60709/ ACTG, P63261                  | ACTB, P60709/ ACTG, P63261 |  |
|                             |                                             | ACTN1, P12814/K1C10, P13645                 | ACTN1, P12814/K1C10, P13645                 | ACTB, P60709/ ACTG, P63261 |  |
| FLNA, P21333/VINC, P18206   |                                             | FLNA, P21333/VINC, P18206                   | FLNA, P21333/VINC, P18206                   | FLNA, P21333/VINC, P18206  |  |
| GRP75, P38646/ANXA6, P08133 |                                             | GRP75, P38646/ANXA6, P08133                 | GRP75, P38646/ANXA6, P08133                 | FLNA, P21333/GELS, P06396  |  |
| TCPD, P50991/K1C10, P13645  |                                             | TCPD, P50991/K1C10, P13645                  | TCPD, P50991/K1C10, P13645                  | TCPD, P50991/K1C10, P13645 |  |
|                             | ACTN1, P12814/FLNA,<br>P21333/HS90A, P07900 | ACTN1, P12814/FLNA,<br>P21333/HS90A, P07900 | ACTN1, P12814/FLNA,<br>P21333/HS90A, P07900 |                            |  |
