# Supplementary material for: A Proteomic View at T Cell Costimulation
Source: PubMed Central journal article supplement (PMC3335147; doi:10.1371/journal.pone.0032994), 2012-04-23
Supplement: pone.0032994.s004.pdf [file pone.0032994.s004.pdf]

**Table S4:** List of identified proteins with respective accession numbers, predicted and experimental molecular weight (MW) as well as sequence coverage and score obtained by Mascot database search.

| protein ID | protein name                                | UniProtKB ID | MW predicted | MW 2DE | seq. cov. | score |
|------------|---------------------------------------------|--------------|--------------|--------|-----------|-------|
| CLIC1      | chloride intracellular channel protein 1    | O00299       | 27117        | 30000  | 37%       | 64    |
| ARPC2      | actin-related protein 2/3 complex subunit 2 | O15144       | 34426        | 32000  | 40%       | 98    |
| ATP5H      | ATP synthase D chain                        | O75947       | 18405        | 23000  | 65%       | 90    |
| PGK1       | phosphoglycerate kinase 1                   | P00558       | 44854        | 42000  | 46%       | 145   |
| FIBB       | fibrinogen beta chain                       | P02675       | 56577        | 55000  | 63%       | 300   |
| FIBG       | fibrinogen gamma chain                      | P02679       | 52106        | 50000  | 56%       | 233   |
| ALBU       | serum albumin                               | P02768       | 71317        | 65000  | 55%       | 287   |
| CXCL7      | platelet basic protein LDGF                 | P02775       | 14171        | 10000  | 38%       | 105   |
| ALDOA      | fructose-bisphosphate aldolase A            | P04075       | 39720        | 40000  | 67%       | 214   |
| SODM       | superoxide dismutase (Mn)                   | P04179       | 24878        | 23000  | 34%       | 58    |
| GAPDH      | glyceraldehyde-3-phosphate dehydrogenase    | P04406       | 36070        | 35000  | 29%       | 58    |
| GELS       | gelsolin, actin-depolymerizing factor       | P06396       | 86043        | 66000  | 16%       | 59    |
| ATPB       | ATP synthase subunit beta                   | P06576       | 56525        | 53000  | 60%       | 225   |
| ENOA       | alpha-enolase                               | P06733       | 47350        | 50000  | 61%       | 278   |
| TPM3       | tropomyosin alpha-3                         | P06753       | 32856        | 33000  | 30%       | 75    |
| LDHB       | L-lactate dehydrogenase beta chain          | P07195       | 36769        | 38000  | 67%       | 211   |
| PDIA1      | protein disulfide-isomerase A1              | P07237       | 57480        | 55000  | 38%       | 172   |
| TUBB       | tubulin beta-2 chain                        | P07437       | 50095        | 56000  | 67%       | 282   |
| PROF1      | profilin-1                                  | P07737       | 15085        | 15000  | 64%       | 90    |
| HS90A      | heat shock protein HSP 90-alpha             | P07900       | 84875        | 90000  | 34%       | 169   |
| ITA2B      | integrin alpha IIb                          | P08514       | 114460       | 105000 | 31%       | 214   |
| ANXA5      | annexin V                                   | P08758       | 35840        | 27000  | 30%       | 62    |
| TPM1       | tropomyosin 1 alpha                         | P09493       | 32746        | 38000  | 25%       | 78    |
| THIO       | thioredoxin                                 | P10599       | 11884        | 13000  | 49%       | 51    |
| GRP78      | 78 kDa glucose-regulated protein            | P11021       | 72402        | 72000  | 53%       | 295   |
| HSP7C      | Heat shock cognate 71 kDa protein           | P11142       | 71082        | 68000  | 58%       | 264   |
| ACTN1      | alpha-actinin-1                             | P12814       | 103563       | 50000  | 32%       | 190   |
| PLSL       | plastin-2                                   | P13796       | 70684        | 64000  | 48%       | 281   |
| VINC       | vinculin                                    | P18206       | 124161       | 66000  | 34%       | 288   |
| FLNA       | filamin-A                                   | P21333       | 283192       | 42000  | 10%       | 79    |
| CALR       | calreticulin                                | P27797       | 48283        | 40000  | 23%       | 70    |
| PSB4       | proteasome subunit beta type 4              | P28070       | 29242        | 28000  | 28%       | 54    |
| TKT        | transketolase                               | P29401       | 68519        | 67000  | 24%       | 75    |
| PDIA3      | protein disulfide-                          | P30101       | 57146        | 60000  | 62%       | 319   |

|       |                                                                                          |        |        |       |     |           |
|-------|------------------------------------------------------------------------------------------|--------|--------|-------|-----|-----------|
|       | isomerase A3                                                                             |        |        |       |     |           |
| GDIA  | Rab-GDI-alpha                                                                            | P31150 | 51177  | 55000 | 41% | 132       |
| MYH9  | myosin-9                                                                                 | P35579 | 227515 | 60000 | 10% | 71        |
| TALDO | transaldolase                                                                            | P37837 | 37688  | 38000 | 28% | 76        |
| CAZA2 | F-actin capping protein<br>alpha-2                                                       | P47755 | 33026  | 35000 | 63% | 167       |
| LIMS1 | LIM and senescent cell<br>antigen-like-contain-ing<br>domain protein 1, protein<br>PINCH | P48059 | 38977  | 35000 | 37% | 88        |
| GDIR1 | Rho GDP-dissociation<br>inhibitor 1                                                      | P52565 | 23119  | 28000 | 47% | 103       |
| GDIR2 | Rho GDP-dissociation<br>inhibitor 2                                                      | P52566 | 22900  | 28000 | 48% | 88        |
| ILK   | integrin-linked protein<br>kinase 2                                                      | P57043 | 51899  | 50000 | 26% | 91/9<br>0 |
| TPIS  | triosephosphate<br>isomerase                                                             | P60174 | 26807  | 28000 | 62% | 155       |
| ARP3  | actin-like protein 3                                                                     | P61158 | 47666  | 50000 | 64% | 275       |
| CALM  | calmodulin                                                                               | P62158 | 16696  | 16000 | 33% | 64        |
| GRB2  | growth factor receptor-<br>bound protein 2                                               | P62993 | 25304  | 28000 | 29% | 77        |
| HBB   | hemoglobin subunit beta                                                                  | P68871 | 15971  | 8000  | 60% | 104       |
| STXB2 | syntaxin-binding protein<br>2                                                            | Q15833 | 66853  | 66000 | 22% | 65        |
| UGPA  | UDP-glucose pyro-<br>phosphorylase 2                                                     | Q16851 | 56945  | 53000 | 15% | 72        |
| SH3L3 | SH3 domain-binding<br>protein 1                                                          | Q9H299 | 10488  | 5000  | 46% | 81        |
| TBA8  | tubulin alpha 8                                                                          | Q9NY65 | 50746  | 18000 | 24% | 55        |
| TLN1  | talin1                                                                                   | Q9Y490 | 271766 | 40000 | 8%  | 61        |
